# Supplementary material for: Preparation of Graphene Quantum Dots by Visible-Fenton Reaction and Ultrasensitive Label-Free Immunosensor for Detecting Lipovitellin of Paralichthys Olivaceus
Source: MDPI journal article supplement (doi:10.3390/bios12040246), 2022-04-15
Supplement: s1 [file s1]

Supporting information

# Preparation of Graphene Quantum Dots by Visible-Fenton Reaction and Ultrasensitive Label-Free Immunosensor for Detecting Lipovitellin of *Paralichthys Olivaceus*

Ailing Yang <sup>1,\*</sup>, Yue Su <sup>1</sup>, Zhenzhong Zhang <sup>2</sup>, Huaidong Wang <sup>1</sup>, Chong Qi <sup>1</sup>, Shaoguo Ru <sup>2</sup> and Jun Wang <sup>2,\*</sup>

<sup>1</sup> College of Physics & Optoelectronic Engineering, Ocean University of China, Qingdao 266100, China; 21170211095@stu.ouc.edu.cn (Y.S.); wanghuaidong@stu.ouc.edu.cn (H.W.); qichong@stu.ouc.edu.cn (C.Q.)

<sup>2</sup> College of Marine Life Sciences, Ocean University of China, Qingdao 266003, China; zhangzhenzhong5391@stu.ouc.edu.cn (Z.Z.); rusg@ouc.edu.cn (S.R.)

\* Correspondence: ailingy@ouc.edu.cn (A.Y.); wangjun@ouc.edu.cn (J.W.); Tel.: +086-532-66781204 (A.Y.)

**Citation:** Yang, A.; Su, Y.; Zhang, Z.; Wang, H.; Qi, C.; Ru, S.; Wang, J. Preparation of Graphene Quantum Dots by Visible-Fenton Reaction and Ultrasensitive Label-Free Immunosensor for Detecting Lipovitellin of *Paralichthys Olivaceus*. *Biosensors* **2022**, *12*, 246. <https://doi.org/10.3390/bios12040246>

Received: 10 December 2021

Accepted: 22 January 2022

Published: 15 April 2022

**Publisher's Note:** MDPI stays neutral with regard to jurisdictional claims in published maps and institutional affiliations.

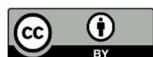

**Copyright:** © 2022 by the authors. Submitted for possible open access publication under the terms and conditions of the Creative Commons Attribution (CC BY) license (<https://creativecommons.org/licenses/by/4.0/>).

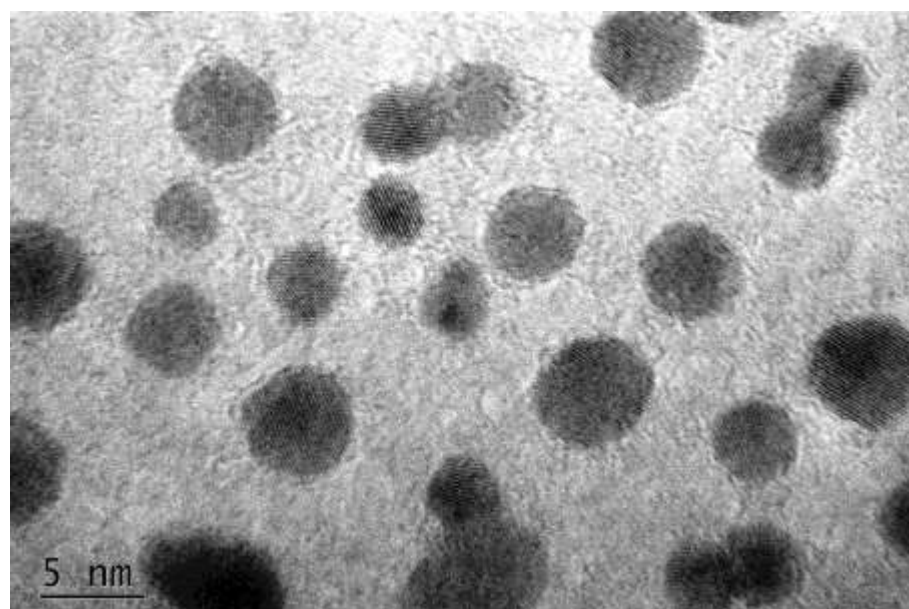

**Figure S1.** The original HRTEM of the GQDs

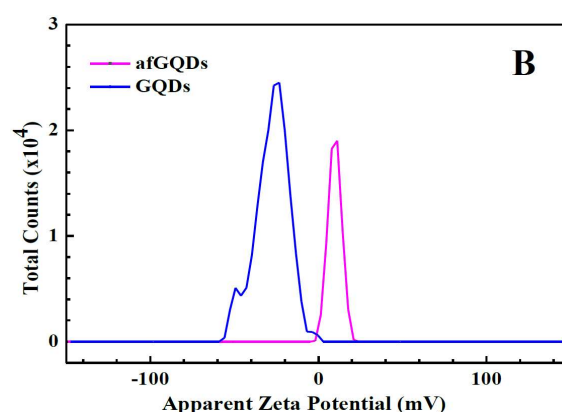

**Figure S2.** Zeta potentials of GQDs and afGQDs.
